# Supplementary material for: In Situ Study on Dehydration and Phase Transformation of Antigorite
Source: MDPI journal article supplement (doi:10.3390/min12050567), 2022-04-30
Supplement: s1 [file s1]

**Table S1. Summary of characteristic Raman peaks of typical minerals in the antigorite dehydration.**

|            | (P, T) (GPa,K) | $\nu$ Tetrahedron (cm <sup>-1</sup> ) | $\nu$ OH (cm <sup>-1</sup> ) | Reference                    |
|------------|----------------|---------------------------------------|------------------------------|------------------------------|
| Antigorite | Ambient        | 228, 375, 685, 1048                   | 3664, 3691                   | This study                   |
| Antigorite | Ambient        | 229, 378, 683, 1045                   | 3669, 3700                   | Debret et al. (2013) [1]     |
| Fo         | Quenched       | 819, 852                              | —                            | This study                   |
| Fo         | Ambient        | 820, 853                              | —                            | Debret et al. (2013) [1]     |
| Cen        | Quenched       | 661, 683, 1012, 1031                  | —                            | This study                   |
| Cen        | Ambient        | 666, 689, 1021, 1034                  | —                            | Lin et al. (2003) [2]        |
| Phase A    | Quenched       | 218, 560, 852                         | 3398, 3449                   | This study                   |
| Phase A    | Ambient        | 220, 550, 807, 845                    | 3400, 3517                   | Maurice et al. (2018) [3]    |
| Talc       | Quenched       | 196, 367, 679                         | 3680                         | This study                   |
| Talc       | ambient        | 195, 363, 676                         | —                            | Likhacheva et al. (2021) [4] |
| Talc       | ambient        | 188, 357, 676                         | 3679                         | Chollet et al. (2009) [5]    |

**Table S2. Composition (wt. %) of reaction products in antigorite dehydration.**

| Mineral                        | Forsterite | Clinoestatite | Phase A | Talc  |
|--------------------------------|------------|---------------|---------|-------|
| SiO <sub>2</sub>               | 40.02      | 54.92         | 26.08   | 58.37 |
| Al <sub>2</sub> O <sub>3</sub> | 0.28       | 1.15          | 0.17    | 2.42  |
| FeO <sub>T</sub>               | 9.66       | 5.68          | 5.49    | 1.99  |
| Cr <sub>2</sub> O <sub>3</sub> | 0.13       | 0.11          | 0.15    | 0.22  |
| MgO                            | 48.61      | 34.80         | 53.04   | 33.78 |
| TiO <sub>2</sub>               | 0.02       | 0.03          | 0.01    | 0.08  |
| MnO                            | 0.10       | 0.16          | 0.08    | 0.01  |
| NiO                            | n.d.       | n.d.          | n.d.    | n.d.  |
| CaO                            | 0.03       | 0.16          | 0.11    | 0.18  |
| P <sub>2</sub> O <sub>5</sub>  | n.d.       | n.d.          | n.d.    | n.d.  |
| K <sub>2</sub> O               | n.d.       | 0.01          | 0.01    | n.d.  |
| Na <sub>2</sub> O              | 0.02       | 0.03          | 0.02    | 0.04  |
| Total                          | 98.87      | 97.04         | 85.15   | 97.09 |

1. Debret, B.; C. Nicollet; M. Andreani; S. Schwartz.; M. Godard. Three steps of serpentinization in an eclogitized oceanic serpentinization front (Lanzo Massif–Western Alps). *Journal of Metamorphic Geology* 2013, **31**, 165-186.
2. Lin, C.-C. Pressure-induced polymorphism in enstatite (MgSiO<sub>3</sub>) at room temperature: clinoenstatite and orthoenstatite. *Journal of Physics and Chemistry of Solids* 2004, **65**, 913-921.
3. Maurice, J.; N. Bolfan-Casanova; J. Padrón-Navarta; G. Manthilake; T. Hammouda; J. Hénot.; D. Andrault. The stability of hydrous phases beyond antigorite breakdown for a magnetite-bearing natural serpentinite between 6.5 and 11 GPa. *Contributions to Mineralogy and Petrology* 2018, **173**, 1-22.
4. Likhacheva, A.Y.; S.V. Goryainov; S.V. Rashchenko; S.N. Dementiev.; O.G. Safonov. In situ observation of chrysotile decomposition in the presence of NaCl-bearing aqueous fluid up to 5 GPa and 400 °C. *Mineralogy and Petrology* 2021, **115**, 213-222.
5. Chollet, M.; I. Daniel; K.T. Koga; S. Petitgirard.; G. Morard. Dehydration kinetics of talc and 10 Å phase: Consequences for subduction zone seismicity. *Earth and Planetary Science Letters* 2009, **284**, 57-64.
